# Supplementary material
Source: PubMed Central journal article supplement (PMC5991952)
Supplement: jcsm.14.6.977s1.pdf [file jcsm.14.6.977s1.pdf]

**Table S1**—Univariate analysis on the covariates of the Bayley Scales of Infant Development scores in the overall child sample.

|                                        | Mean (SD) or<br>n (%) | MDI            |                   | PDI            |                   |
|----------------------------------------|-----------------------|----------------|-------------------|----------------|-------------------|
|                                        |                       | Mean (SD)      | Statistic value   | Mean (SD)      | Statistic value   |
| Age (months)                           | 11.82 (8.1)           | -              | $r = 0.23^{***}$  | -              | $r = 0.04$        |
| Sex                                    |                       |                | $t = -1.56$       |                | $t = -0.45$       |
| Boys                                   | 593 (54.0)            | 102.39 (17.18) |                   | 101.77 (15.97) |                   |
| Girls                                  | 509 (46.0)            | 103.99 (17.03) |                   | 102.20 (15.85) |                   |
| Birth weight                           |                       |                | $F = 7.69^{***}$  |                | $F = 7.60^{**}$   |
| < 3000 g                               | 239 (21.7)            | 99.49 (16.93)  |                   | 99.32 (15.87)  |                   |
| 3001-4000 g                            | 782 (71.0)            | 103.95 (16.99) |                   | 102.21 (15.57) |                   |
| > 4000 g                               | 77 (7.0)              | 106.30 (17.97) |                   | 107.14 (17.47) |                   |
| Maternal education                     |                       |                | $F = 34.57^{***}$ |                | $F = 10.74^{***}$ |
| Secondary school or lower <sup>a</sup> | 295 (27.0)            | 98.38 (14.98)  |                   | 99.32 (99.32)  |                   |
| High school                            | 304 (28.0)            | 100.33 (16.12) |                   | 100.40 (15.20) |                   |
| College and above                      | 486 (45.0)            | 107.70 (17.89) |                   | 104.24 (16.04) |                   |
| Province                               |                       |                | $F = 47.85^{***}$ |                | $F = 33.03^{***}$ |
| Guang Xi                               | 133 (12.1)            | 108.21 (14.96) |                   | 105.92 (15.75) |                   |
| He Bei                                 | 149 (13.5)            | 106.31 (15.32) |                   | 105.25 (15.37) |                   |
| Hu Nan                                 | 158 (14.3)            | 88.49 (11.75)  |                   | 90.31 (13.10)  |                   |
| Jiang Su                               | 163 (14.8)            | 104.88 (13.89) |                   | 102.89 (11.66) |                   |
| Inner Mongolia                         | 112 (10.2)            | 102.36 (15.45) |                   | 97.96 (15.23)  |                   |
| Shan Dong                              | 150 (13.6)            | 107.83 (17.45) |                   | 106.91 (14.78) |                   |
| Yu Nan                                 | 122 (11.1)            | 92.82 (14.84)  |                   | 95.34 (13.08)  |                   |
| Zhe Jiang                              | 115 (10.4)            | 116.31 (16.59) |                   | 112.38 (17.35) |                   |
| Area                                   |                       |                | $t = 1.40$        |                | $t = -0.15$       |
| Urban                                  | 523 (47.5)            | 103.91 (17.05) |                   | 102.34 (16.23) |                   |
| Rural                                  | 421 (38.2)            | 102.35 (16.94) |                   | 102.50 (15.71) |                   |
| Bedroom sharing                        |                       |                | $t = -0.14$       |                | $t = -0.25$       |
| Yes                                    | 899 (81.6)            | 103.18 (17.29) |                   | 102.03 (15.90) |                   |
| No                                     | 200 (18.1)            | 103.00 (16.42) |                   | 101.72 (16.07) |                   |
| Current breastfeeding                  |                       |                | $t = 6.78^{***}$  |                | $t = -1.18$       |
| Yes                                    | 484 (43.9)            | 99.29 (15.77)  |                   | 102.40 (16.08) |                   |
| No                                     | 543 (49.3)            | 106.36 (17.67) |                   | 101.24 (15.28) |                   |

<sup>a</sup> = secondary school is equivalent to 9th grade level in the United States. Significant differences at  $P < .05$  are denoted in bold. MDI = Mental Development Index, PDI = Psychomotor Development Index, SD = standard deviation.
